# Supplementary material for: Tailoring electronic environments of dispersed Ru sites for efficient alkaline hydrogen evolution
Source: Royal Society of Chemistry journal article supplement (doi:10.1039/d4qi01505c), 2024-01-01
Supplement: d4qi01505c1.pdf [file d4qi01505c1.pdf]

*Supporting Information*

**Tailoring Electronic Environments of Dispersed Ru Sites for Efficient Alkaline Hydrogen Evolution**

Mengyu Zhang<sup>a</sup>, Bowen Zhou<sup>a</sup>, Lingfei Guo<sup>a</sup>, Hongdong Li<sup>a</sup>, Weiping Xiao<sup>b</sup>, Guangrui Xu<sup>c</sup>, Dehong Chen<sup>c</sup>, Caixia Li<sup>d</sup>, Yunmei Du<sup>d</sup>, Zexing Wu<sup>a,\*</sup>, Lei Wang<sup>a,\*</sup>

[a] Key Laboratory of Eco-chemical Engineering, Ministry of Education, International Science and Technology Cooperation Base of Eco-chemical Engineering and Green Manufacturing, College of Chemistry and Molecular Engineering, Qingdao University of Science & Technology 53 Zhengzhou Road, 266042, Qingdao, P. R. China E-mail: splswzx@qust.edu.cn; inorchemwl@126.com

[b] College of Science, Nanjing Forestry University, Nanjing 210037, Jiangsu, China

[c] College of Materials Science and Engineering, Qingdao University of Science & Technology 53 Zhengzhou Road, 266042, Qingdao, P. R. China

[d] College of Environment and Safety Engineering, Qingdao University of Science and Technology, Qingdao, 266042, China

## **Experimental section**

### **Chemical reagents and materials**

Anhydrous ethanol ( $\geq 99.7$  wt.%) was purchased from Sinopharm Chemical Reagent co. Ltd. (Shanghai, China). Cobalt nitrate hexahydrate ( $\text{Co}(\text{NO}_3)_2 \cdot 6\text{H}_2\text{O}$ ,  $\geq 99.0$  wt.%), Ruthenium carbon (Ru/C, 5%) and potassium hydroxide (KOH) were supplied by Macklin Biochemical Co., Ltd. (Shanghai, China). Nickel nitrate hexahydrate ( $\text{Ni}(\text{NO}_3)_2 \cdot 6\text{H}_2\text{O}$ ,  $\geq 98.5$  wt.%), hydrochloric acid, and acetone were obtained from Xilong Science Co., Ltd. (Guangzhou, China). Urea ( $\text{N}_2\text{H}_4\text{CO}$ ,  $\geq 99.5$  wt.%) and anhydrous ruthenium (III) chloride ( $\text{RuCl}_3$ , 45-55 wt.%) were purchased from Aladdin Chemical Reagent Co., Ltd. (Shanghai, China). Ammonium fluoride ( $\text{NH}_4\text{F}$ ,  $\geq 96.0$  wt.%) was supplied by Sinopharm Chemical Reagent co. Ltd. (Shanghai, China). Deionized water used in the experiment was always ultrapure water ( $18.2 \text{ M}\Omega \cdot \text{cm}$ ). Platinum, nominally 20% on carbon black (Pt/C 20%) was purchased from Thermo Scientific Co., Ltd. (Shanghai, China).

### **Synthesis of NiCo-OH/CC**

The carbon cloth ( $3 \times 4 \text{ cm}^2$ ) was ultrasonically cleaned sequentially in acetone, 3 M hydrochloric acid, deionized water, and ethanol.  $\text{Co}(\text{NO}_3)_2 \cdot 6\text{H}_2\text{O}$  (348.0 mg) and  $\text{Ni}(\text{NO}_3)_2 \cdot 6\text{H}_2\text{O}$  (162.5 mg) were dissolved in 35 mL of deionized water and stirred for 30 minutes. Subsequently, 180 mg of  $\text{CO}(\text{NH}_2)_2$  and 44.4 mg of  $\text{NH}_4\text{F}$  were added to the solution. The mixture was transferred to a 50 mL Teflon-lined autoclave, and a piece of pretreated carbon cloth was immersed in it. The autoclave was sealed and heated at  $120 \text{ }^\circ\text{C}$  for 5 hours. After cooling to room temperature, the sample was washed several times with deionized water and dried in an oven at  $60 \text{ }^\circ\text{C}$ .

### **Synthesis of NiCo<sub>2</sub>O<sub>4</sub>/CC**

The as-prepared NiCo-OH/CC was placed in the center of a tube furnace and heated at  $400 \text{ }^\circ\text{C}$  for 3 hours in air to obtain NiCo<sub>2</sub>O<sub>4</sub>.

### **Synthesis of Ru-NiCoO<sub>2</sub>/CC**

The Ru-NiCoO<sub>2</sub> catalyst was fabricated using a facile galvanostatic deposition strategy

in the electrochemical workstation (CHI760E, Inc. China). Typically, the as-prepared NiCo<sub>2</sub>O<sub>4</sub>/CC served as the working electrode, and a high-purity graphite rod was used as the counter electrode. Ru deposition was carried out in an electrolyte containing RuCl<sub>3</sub> ( $3 \times 10^{-3}$  M) and NH<sub>2</sub>SO<sub>3</sub>H ( $30 \times 10^{-3}$  M) under a current density of -0.2 mA cm<sup>-2</sup> for 1200 seconds.

### **Synthesis of Ru-NiCo<sub>2</sub>O<sub>4</sub>/CC**

Co(NO<sub>3</sub>)<sub>2</sub>·6H<sub>2</sub>O (348.0 mg) and Ni(NO<sub>3</sub>)<sub>2</sub> · 6H<sub>2</sub>O (162.5 mg), were dissolved in 35 ml of deionized water and stirred for 30 min, followed by the addition of CO (NH<sub>2</sub>)<sub>2</sub> (180 mg), NH<sub>4</sub>F (44.4 mg), RuCl<sub>3</sub>·xH<sub>2</sub>O (24.7 mg) and NH<sub>2</sub>SO<sub>3</sub>H (105 mg), and stirred for another 10 min. The solution was then transferred to a Teflon-lined autoclave (50 ml), and a piece of pretreated CC ( $3 \times 4$  cm<sup>2</sup>) was immersed in the solution and placed vertically. The autoclave was sealed and kept at 120 °C for 5 h, after which it was allowed to cool naturally. Washing the obtained CC several times with deionized water and anhydrous ethanol and dried at 60 °C. At last, placed it in the center of the tube furnace and annealed at 400 °C in air for 3 h at a ramp rate of 5 °C min<sup>-1</sup> to obtain Ru-NiCo<sub>2</sub>O<sub>4</sub>/CC.

### **Synthesis of Ru/CC**

Using a facile galvanostatic deposition strategy in the electrochemical workstation (CHI760E, Inc. China). Typically, the CC served as the working electrode, and a high-purity graphite rod was used as the counter electrode. Ru deposition was carried out in an electrolyte containing RuCl<sub>3</sub> ( $3 \times 10^{-3}$  M) and NH<sub>2</sub>SO<sub>3</sub>H ( $30 \times 10^{-3}$  M) under a current density of -0.2 mA cm<sup>-2</sup> for 1200 seconds.

### **Electrochemical Measurements**

HER electrochemical tests were conducted in an alkaline medium (1 M KOH / 1 M KOH + seawater) using a CHI 760E electrochemical workstation in a three-electrode system. A reversible hydrogen electrode (RHE) served as the reference electrode, and a graphite rod was used as the counter electrode. Linear sweep voltammetry (LSV) was performed with 95% iR compensation at a scan rate of 5 mV s<sup>-1</sup>. Electrochemical impedance spectroscopy (EIS) measurements were taken over a frequency range of 0.1

to 100 kHz with an AC amplitude of 5 mV. All stability tests were carried out without iR compensation. Using a RuO<sub>2</sub>|| Ru-NiCoO<sub>2</sub>/CC electrolytic cell, the generated gas was collected by the drainage method, and the Faradaic efficiency was estimated.

### **Physical characterization**

The morphologies were observed using a scanning electron microscope (SEM) Hitachi S-4800. Transmission electron microscopy (TEM) and high-resolution TEM (HRTEM) measurements were performed using an FEI Tecnai G20 with a 200 kV acceleration voltage. Energy-dispersive X-ray spectroscopy (EDS) mapping was also conducted with the FEI Tecnai G20 (200 kV). The purity and crystal properties of the catalysts were evaluated by Rigaku D/max-2500 pc X-ray diffraction (XRD) using Cu K $\alpha$  radiation ( $\lambda = 1.54 \text{ \AA}$ ) at a scan rate of  $2^\circ \text{ s}^{-1}$ . The chemical states of the samples were analyzed using Thermo Fisher Scientific II X-ray photoelectron spectroscopy (XPS) with an Al K $\alpha$  source. Contact angle measurements were performed using a Dataphysics-OCA100. Raman spectra were obtained with a LabRAM HR Evolution using an excitation wavelength of 532 nm.

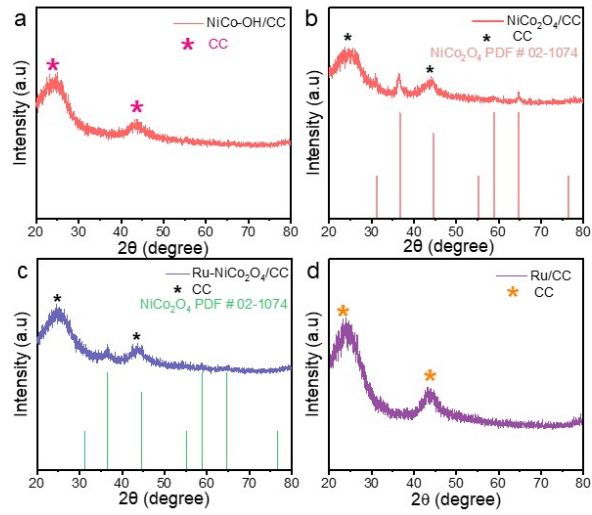

**Fig. S1** The XRD patterns of (a)  $\text{NiCo-OH/CC}$ , (b)  $\text{NiCo}_2\text{O}_4/\text{CC}$ , (c)  $\text{Ru-NiCo}_2\text{O}_4/\text{CC}$  and (d)  $\text{Ru/CC}$ .

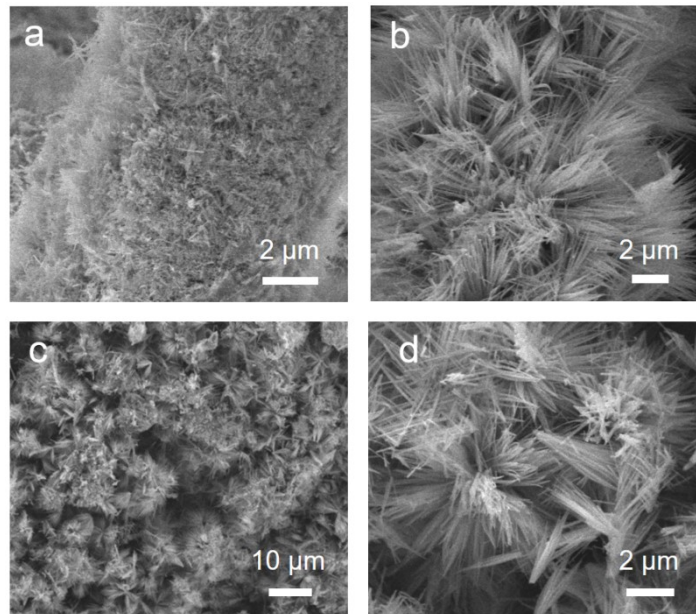

**Fig. S2** SEM images of (a, b)  $\text{NiCo-OH/CC}$ , (c, d)  $\text{NiCo}_2\text{O}_4/\text{CC}$ .

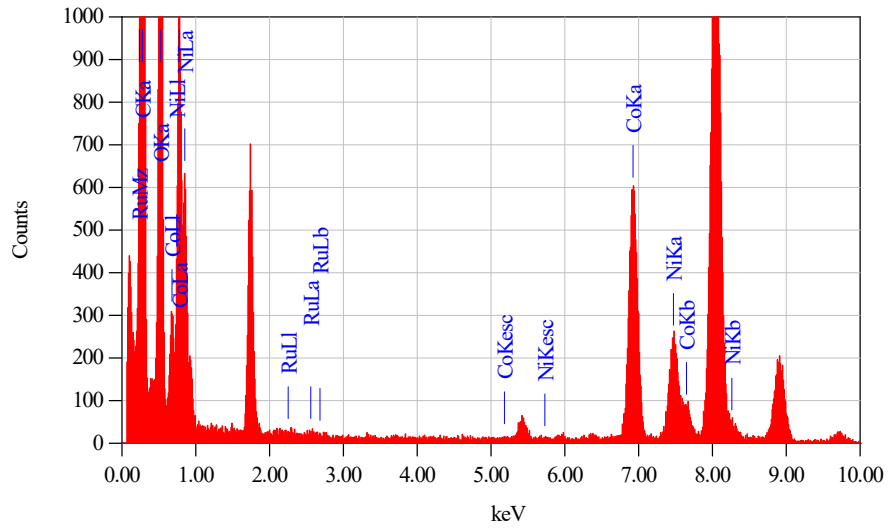

**Fig. S3** Elemental maps obtained by point-scanning the energy spectrum for a position of Ru-NiCoO<sub>2</sub>/CC.

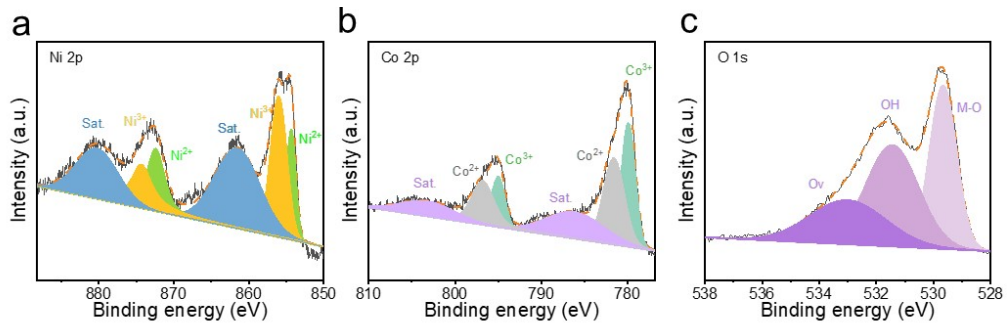

**Fig S4.** XPS spectrum of (a) Ni 2p, (b) Co 2p and (c) O 1s of NiCo<sub>2</sub>O<sub>4</sub>/CC.

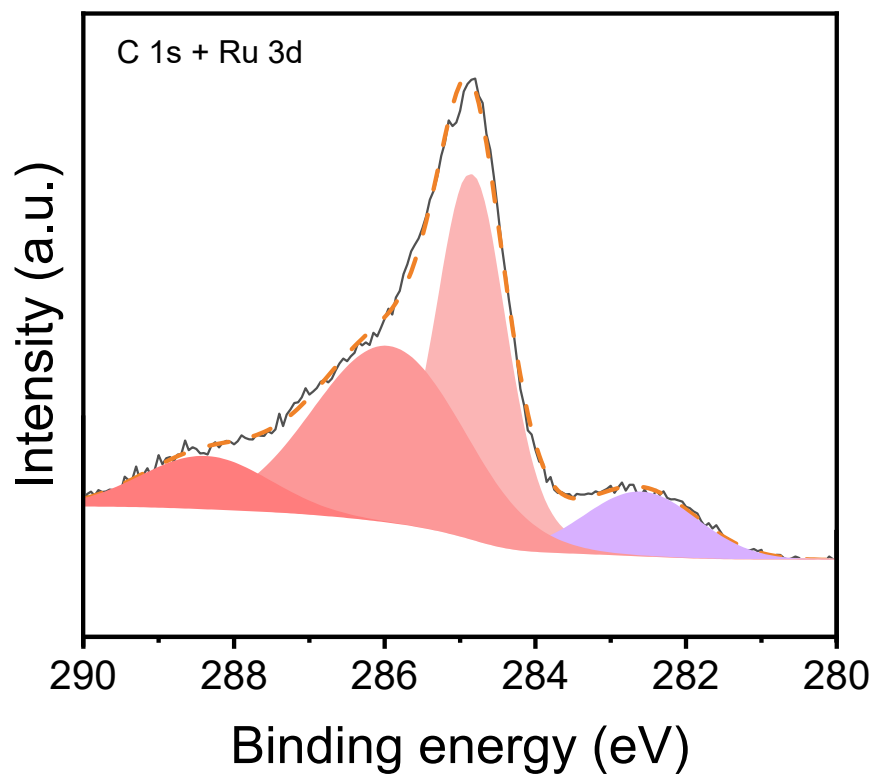

Fig S5. XPS spectrum of C 1s of Ru-NiCoO<sub>2</sub>/CC.

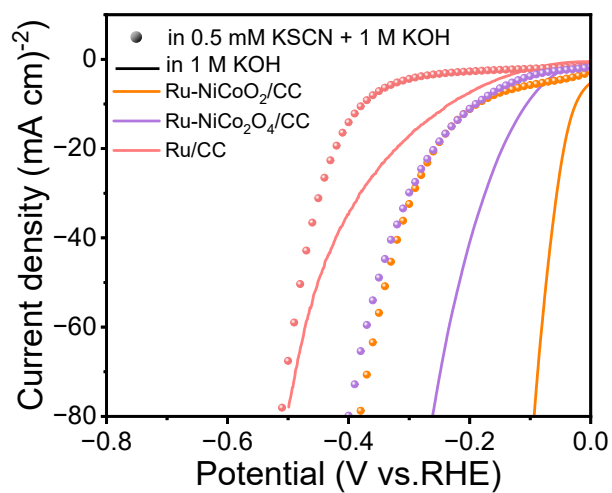

Fig S6. Poisoning experiment of Ru-NiCoO<sub>2</sub>/CC, Ru-NiCo<sub>2</sub>O<sub>4</sub>/CC and Ru/CC in 1 M KOH with the addition of 0.5 mM of potassium thiocyanate.

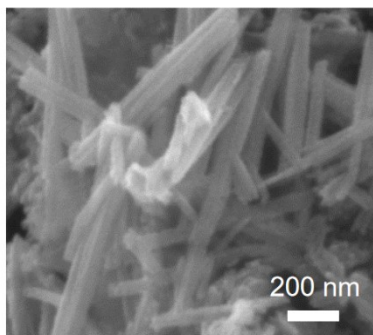

Fig S7. SEM image of Ru -NiCoO<sub>2</sub>/CC after i-t test in 1 M KOH.

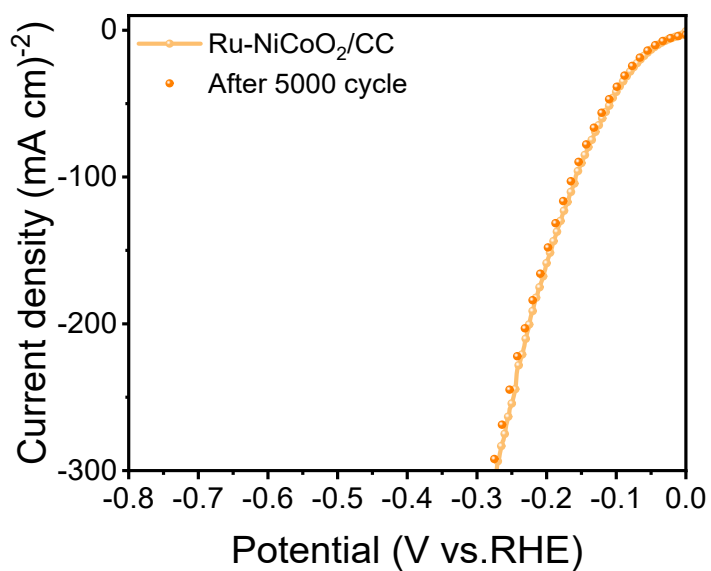

Fig S8. LSV curves before and after 5000CV cycle in 1 M KOH.

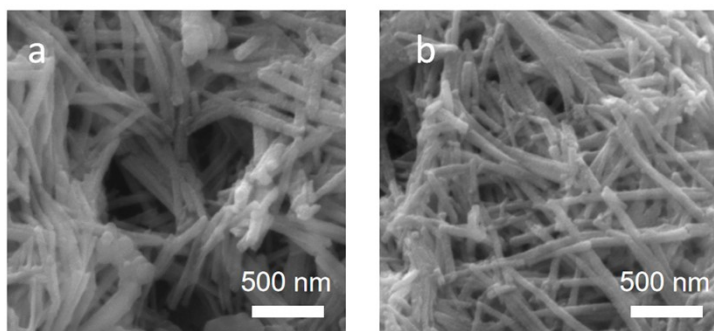

Fig S9. SEM images of Ru-NiCoO<sub>2</sub>/CC after i-t test in 1 M KOH + seawater.



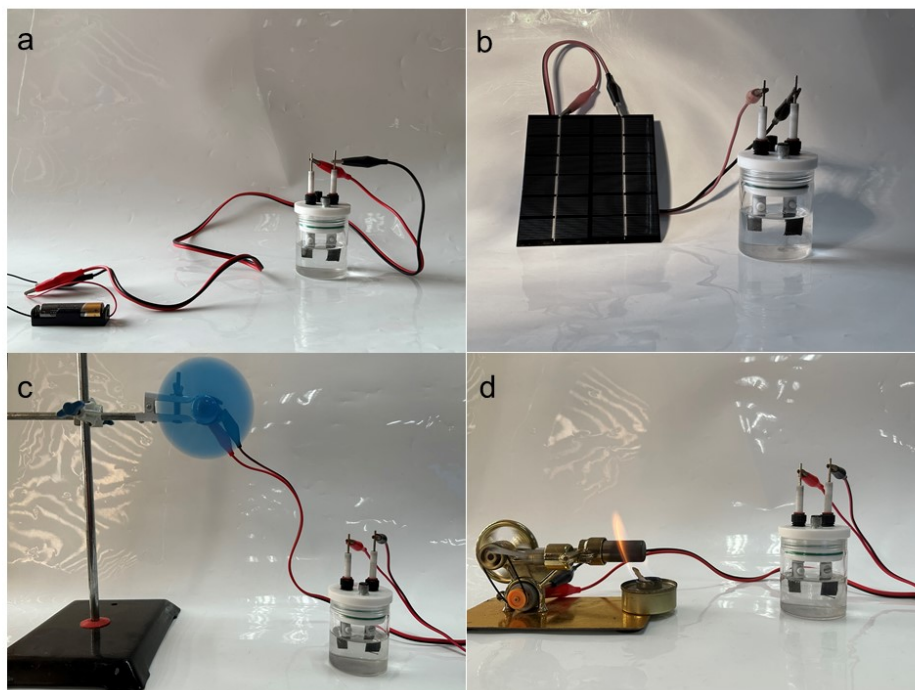

**Fig S10.** Schematic of overall water splitting powered with the electric energy generated by (a) a single AAA battery, (b) solar energy, (c) wind and (d) thermal.

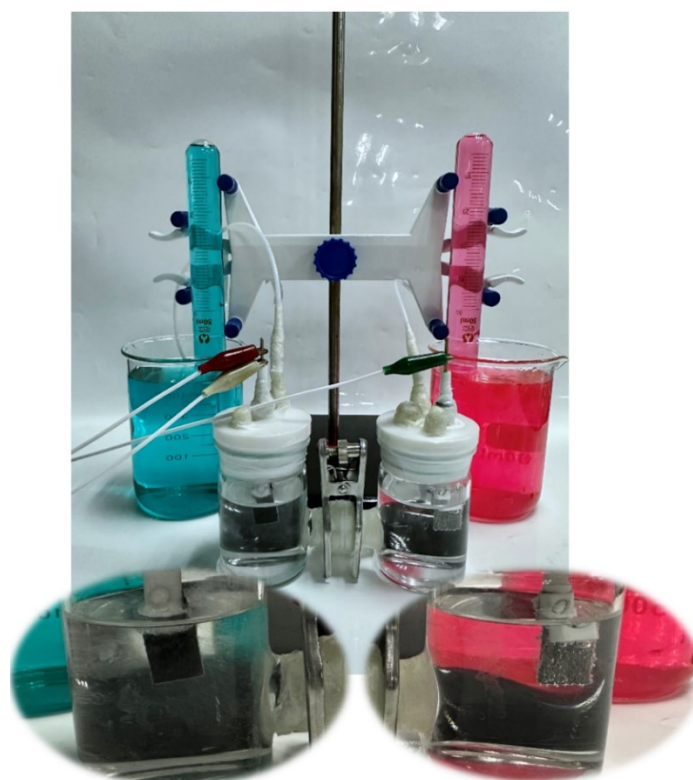

**Fig. S11.** The device of collecting gas by the drainage method.

**Table S1.** Relative elemental content of Ru-NiCoO<sub>2</sub>/CC.

| Element       | Line Type | Absorption Correction | wt%           | wt% Sigma     |
|---------------|-----------|-----------------------|---------------|---------------|
| C             | K series  | 1.00                  | 80.37         | 88.64         |
| O             | K series  | 1.00                  | 11.52         | 9.54          |
| Co            | K series  | 1.00                  | 5.80          | 1.30          |
| Ni            | K series  | 1.00                  | 2.24          | 0.50          |
| Ru            | L series  | 1.00                  | 0.07          | 0.01          |
| <b>Total:</b> |           |                       | <b>100.00</b> | <b>100.00</b> |

**Table S2.** Comparison of the HER performance of the Ru-NiCoO<sub>2</sub>/CC with other previously reported electrocatalysts with overpotential versus Tafel slope in 1.0 M KOH.

| Catalyst                                             | $\eta_{10}$ / mV | Tafel slopes (mV dec <sup>-1</sup> ) | Ref.             |
|------------------------------------------------------|------------------|--------------------------------------|------------------|
| <b>Ru-NiCoO<sub>2</sub>/CC</b>                       | 37               | 63.7                                 | <b>This work</b> |
| <b>RuNiCo<sub>0.5</sub>-600 °C</b>                   | 42               | 62                                   | [1]              |
| <b>NiCoP/CC</b>                                      | 62               | 68                                   | [2]              |
| <b>Ru/CoO</b>                                        | 55               | 70                                   | [3]              |
| <b>RuNi-0</b>                                        | 69               | 7                                    | [4]              |
| <b>Ni-Co-P-00</b>                                    | 150              | 60                                   | [5]              |
| <b>Co-RGO</b>                                        | 156              | 70                                   | [6]              |
| <b>CoP</b>                                           | 226              | 76                                   | [7]              |
| <b>Ni<sub>0</sub>.Co<sub>0.67</sub>S<sub>2</sub></b> | 88               | 91                                   | [8]              |
| <b>Ru-CoP CC</b>                                     | 45               | 98                                   | [9]              |
| <b>RuNi-alloy@SC</b>                                 | 9                | 96                                   | [10]             |

**Table S.** Comparison of the HER performance of the Ru-NiCoO<sub>2</sub>/CC with other previously reported electrocatalysts with overpotential in 1.0 M KOH + seawater.

| <b>Catalyst</b>                                         | <b><math>\eta_{10}</math> / mV</b> | <b>Ref.</b>      |
|---------------------------------------------------------|------------------------------------|------------------|
| <b>Ru-NiCoO<sub>2</sub>/CC</b>                          | 50                                 | <b>This Work</b> |
| <b>Ru/B-Ni<sub>2</sub>P/Ni<sub>5</sub>P<sub>4</sub></b> | 57                                 | [11]             |
| <b>Ru<sub>1+NPS</sub>/N-C</b>                           | 58                                 | [12]             |
| <b>Co@RuCo-</b>                                         | 59                                 | [13]             |
| <b>Ru<sub>22</sub>NiMoP<sub>2</sub>/NF</b>              | 60                                 | [14]             |
| <b>Pt-Ru-Ni</b>                                         | 65                                 | [15]             |
| <b>RuFe-Ni<sub>2</sub>P@NF</b>                          | 81                                 | [16]             |
| <b>NiFeRuO<sub>x</sub>/NF</b>                           | 98                                 | [17]             |
| <b>Mo-Ni<sub>2</sub>P/CC</b>                            | 154                                | [18]             |
| <b>NiCoN NixP NiCoN</b>                                 | 165                                | [19]             |
| <b>Ru-WO<sub>x</sub></b>                                | 218                                | [20]             |
| <b>Ru-W-NiSe<sub>2</sub>/NF</b>                         | 5                                  | [21]             |

## Reference

- [1] H. Liu, Y. Jiang, Y.N. Mao, The role of various components in Ru-NiCo alloys in boosting the performance of overall water splitting, *J. Colloid Interface Sci.*, 2023, 633, 189-198.
- [2] C. Du, L. Yang, F.L. Yang, Nest-like NiCoP for Highly Efficient Overall Water Splitting, *ACS Catal.*, 2017, 7, 4131-4137.
- [3] J.X. Guo, D.Y. Yan, K.W. Qiu, High electrocatalytic hydrogen evolution activity on a coupled Ru and CoO hybrid electrocatalyst, *J. Energy Chem.*, 2019, 37, 143-147.
- [4] N. Liu, Z.H. Zhai, B. Yu, Bifunctional nanoporous ruthenium-nickel alloy nanowire electrocatalysts towards oxygen/hydrogen evolution reaction, *Int. J. Hydrogen Energy*, 2022, 47, 31330-31341.
- [5] Y. Feng, X.Y. Yu, U. Paik, Nickel cobalt phosphides quasi-hollow nanocubes as an efficient electrocatalyst for hydrogen evolution in alkaline solution, *Chem. Commun.*, 2016, 52, 1633-1636.
- [6] M. Li, X.T. Liu, Y.P. Xiong, Facile synthesis of various highly dispersive CoP nanocrystal embedded carbon matrices as efficient electrocatalysts for the hydrogen evolution reaction, *J. Mater. Chem. A*, 2015, 3, 4255-4265.
- [7] Q. Liu, J.Q. Tian, W. Cui, Carbon Nanotubes Decorated with CoP Nanocrystals: A Highly Active Non-Noble-Metal Nanohybrid Electrocatalyst for Hydrogen Evolution, *Angew. Chem. Int. Ed.*, 2014, 53, 6710-6714.
- [8] Z. Peng, D.S. Jia, A.M. Al-Enizi, From Water Oxidation to Reduction: Homologous Ni-Co Based Nanowires as Complementary Water Splitting Electrocatalysts, *Adv. Energy Mater.*, 2015, 5, 1402031.
- [9] H. Cui, M. Jiang, G. Tan, The In-situ Growth of Ru Modified CoP Nanoflakes on Carbon Clothes as Efficient Electrocatalysts for HER\*\*, *Chemelectrochem*, 2022, 9, 82.
- [10] X. Bai, Q.Q. Pang, X. Du, Integrating RuNi alloy in S-doped defective carbon for efficient hydrogen evolution in both acidic and alkaline media, *Chem. Eng. J.*, 2021,

417, 129319.

- [11] Y. Wang, Q. Sun, Z. Wang, In situ phase-reconfiguration to synthesize Ru, B co-doped nickel phosphide for energy-efficient hydrogen generation in alkaline electrolytes, *J. Mater. Chem. A*, 2022, 10, 16236-16242.
- [12] S.R. Wang, M.M. Wang, Z. Liu, Synergetic Function of the Single-Atom Ru-N<sub>4</sub> Site and Ru Nanoparticles for Hydrogen Production in a Wide pH Range and Seawater Electrolysis, *ACS Appl. Mater. Interfaces*, 2022, 14, 15250-15258.
- [13] H. Huang, H. Jung, C.Y. Park, Surface conversion derived core-shell nanostructures of Co particles@RuCo alloy for superior hydrogen evolution in alkali and seawater, *Appl. Catal. B Environ.*, 2022, 315, 121554.
- [14] H.K. Sadhanala, A. Gupta, A. Gedanken, A bifunctional electrocatalyst for alkaline seawater splitting using ruthenium doped nickel molybdenum phosphide nanosheets, *Sustain. Energy Fuels*, 2023, 7, 4677-4686.
- [15] H.Y. Li, Q.W. Tang, B.L. He, Robust electrocatalysts from an alloyed Pt-Ru-M (M = Cr, Fe, Co, Ni, Mo)-decorated Ti mesh for hydrogen evolution by seawater splitting, *J. Mater. Chem. A*, 2016, 4, 6513-6520.
- [16] X.J. Zhai, Q.P. Yu, J.Q. Chi, Accelerated dehydrogenation kinetics through Ru, Fe dual-doped Ni<sub>2</sub>P as bifunctional electrocatalyst for hydrazine-assisted self-powered hydrogen generation, *Nano Energy*, 2023, 105, 108008.
- [17] Y. Liu, L. Chen, Y. Wang, NiFeRuO<sub>x</sub> nanosheets on Ni foam as an electrocatalyst for efficient overall alkaline seawater splitting, *Front. Chem. Sci. Eng.*, 2023, 9, 1698–1706.
- [18] X. Li, Y.D. Wu, S.S. Li, Efficient hydrogen evolution of Ni<sub>2</sub>P via incorporation of Mo for alkaline freshwater and seawater electrolysis, *New J. Chem.*, 2022, 46, 20602-20609.
- [19] L. Yu, L.B. Wu, S.W. Song, Hydrogen Generation from Seawater Electrolysis over a Sandwich-like NiCoNINi<sub>x</sub>PINiCoN Microsheet Array Catalyst, *ACS Energy Lett.*, 2020, 5, 2681-2689.
- [20] Y. Zhang, W. Zheng, H. Wu, Tungsten oxide-anchored Ru clusters with

electron - rich and anti-corrosive microenvironments for efficient and robust seawater splitting, *SusMat*, 2023, 4, 106-115.

- [21] Y.C. Dang, G.Q. Wang, X. Li, Enhanced alkaline/seawater hydrogen evolution reaction performance of NiSe<sub>2</sub> by ruthenium and tungsten bimetal doping, *Int. J. Hydrogen Energy*, 2023, 48, 17035-17044.
